# Supplementary material
Source: publisher figshare collection journal article supplement (https://acs.figshare.com/ndownloader/files/23535424)
Supplement: Supplementary file 1 [file 23535424]

# Supporting Information

## Conformal Shell Amorphization of Nanoporous Ag-Bi for Efficient Formate Generation

Xiangji Zhou,<sup>†</sup> Xianglong Lu,<sup>†</sup> Tianshui Yu,<sup>†</sup> Hailing Wang,<sup>†</sup> Lihua Qian,<sup>\*,†</sup> Pengxiang Lei,<sup>‡</sup>  
Yao Yu,<sup>§</sup> Lin Liu,<sup>§</sup> Shengguo Xia<sup>||</sup> and Jiakun Fang<sup>||</sup>

<sup>†</sup> School of Physics, Huazhong University of Science and Technology, Wuhan 430074, China.

<sup>‡</sup> School of Chemistry and Chemical Engineering, Hubei University of Technology, Wuhan 430068, China.

<sup>§</sup> School of Materials Science and Engineering, Huazhong University of Science and Technology, Wuhan, 430074, China.

<sup>||</sup> State Key Lab of Advanced Electromagnetic Engineering and Technology, School of Electrical and Electronic Engineering, Huazhong University of Science and Technology, Wuhan 430074, China.

### Corresponding Author

\*L. Qian. E-mail: [lhqian@hust.edu.cn](mailto:lhqian@hust.edu.cn)

### Contents of supporting information:

Figure S1. Microstructural characterizations of the NPSB.

Figure S2. CV tests of fresh a-NPSB and nanoporous Ag.

Figure S3. Statistical distribution on the thickness of the amorphous layer.

Figure S4. Microstructural characterizations of the Bi-NPs.

Figure S5. EDS and XRD on the NPSB, the a-NPSB and the c-NPSB.

Figure S6. SEM and STEM characterizations of the c-NPSB.

Figure S7. CV tests for electric double-layer capacitance of the catalysts.

Figure S8. XRD and XPS on fresh a-NPSB and used a-NPSB.

Table S1. The Bi concentration estimated by ICP-OES analysis.

Table S2. The performance of Bi derived catalysts in previous investigations.

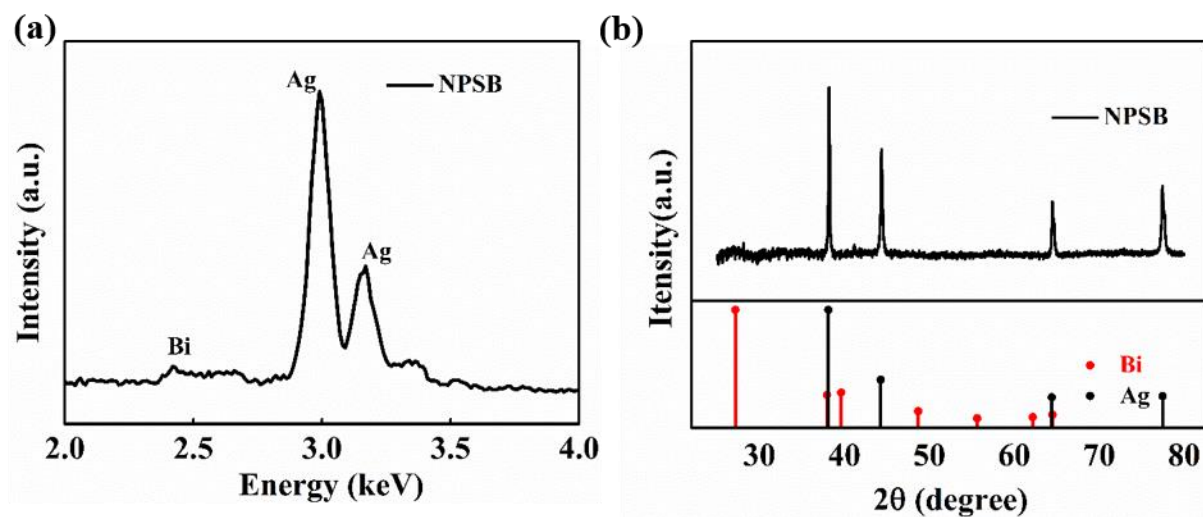

**Figure S1.** (a) The EDS pattern of the NPSB indicates atomic concentration of Bi element as 2.27 atom %. (b) The XRD pattern of the NPSB shows four sharp diffraction peaks corresponding to Ag polycrystal. No signal can be detected from Bi crystal, implying the formation of Ag-Bi solid solution.

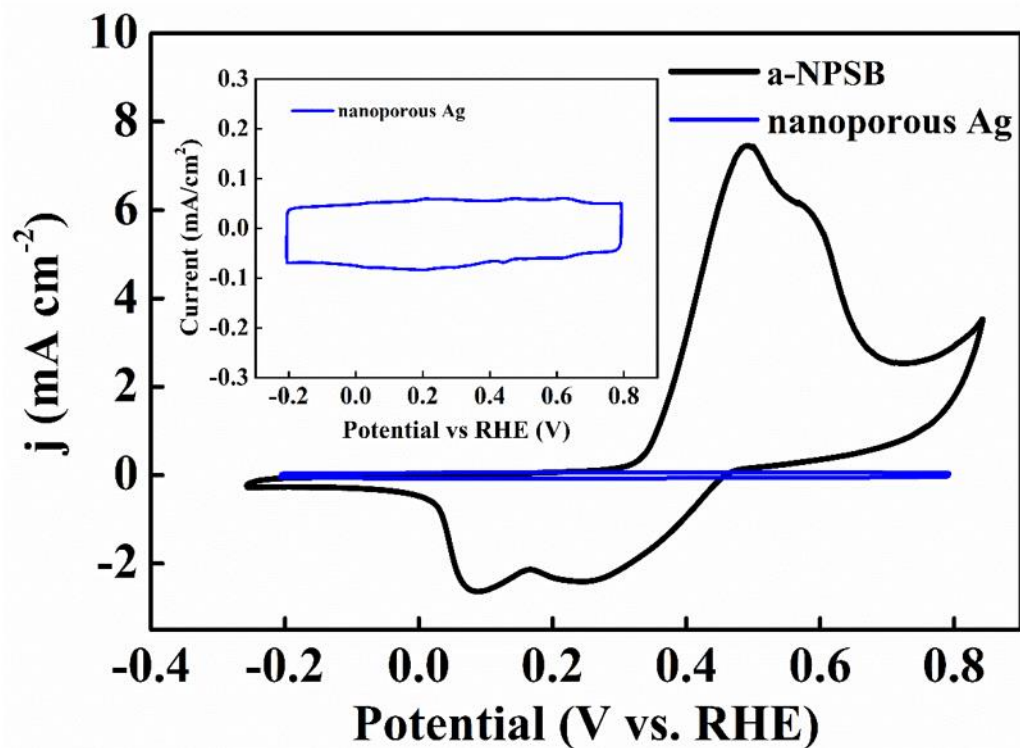

**Figure S2.** The CV curves of the a-NPSB and nanoporous Ag. The electrochemical measurement is conducted in CO<sub>2</sub> saturated 0.1 M KHCO<sub>3</sub> electrolyte with scan rate of 5 mV/s. The redox peaks of the a-NPSB correspond to the dissolution of amorphous Bi<sub>2</sub>O<sub>3</sub> and Bi deposition on the a-NPSB. The redox of Ag atoms does not get involved in this potential range.

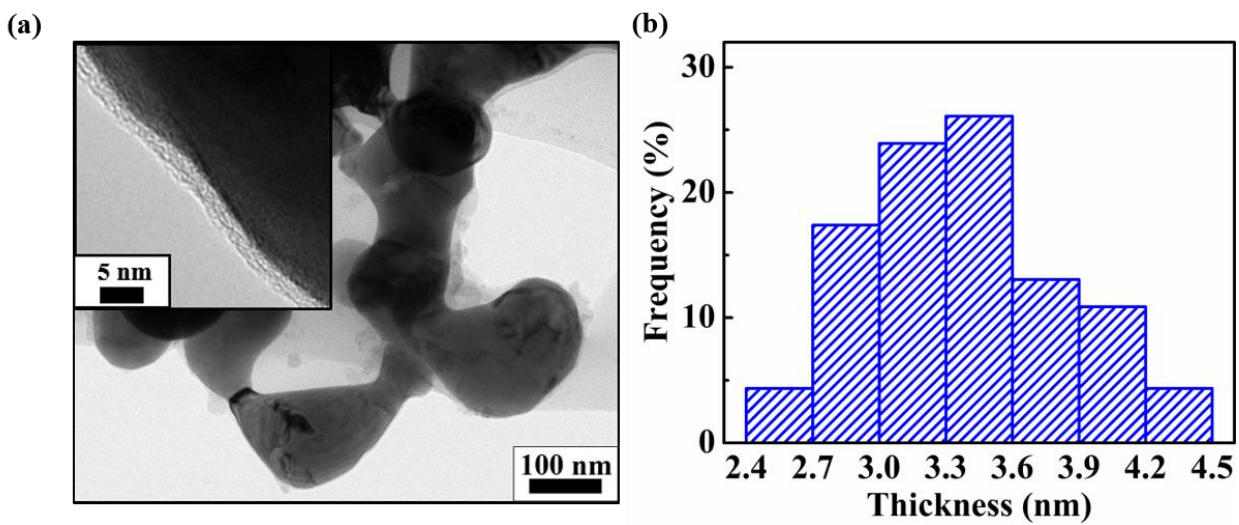

**Figure S3.** (a) TEM and HRTEM images of the a-NPSB. (b) Statistical distribution on the thickness of amorphous  $\text{Bi}_2\text{O}_3$  layer based on the morphology.

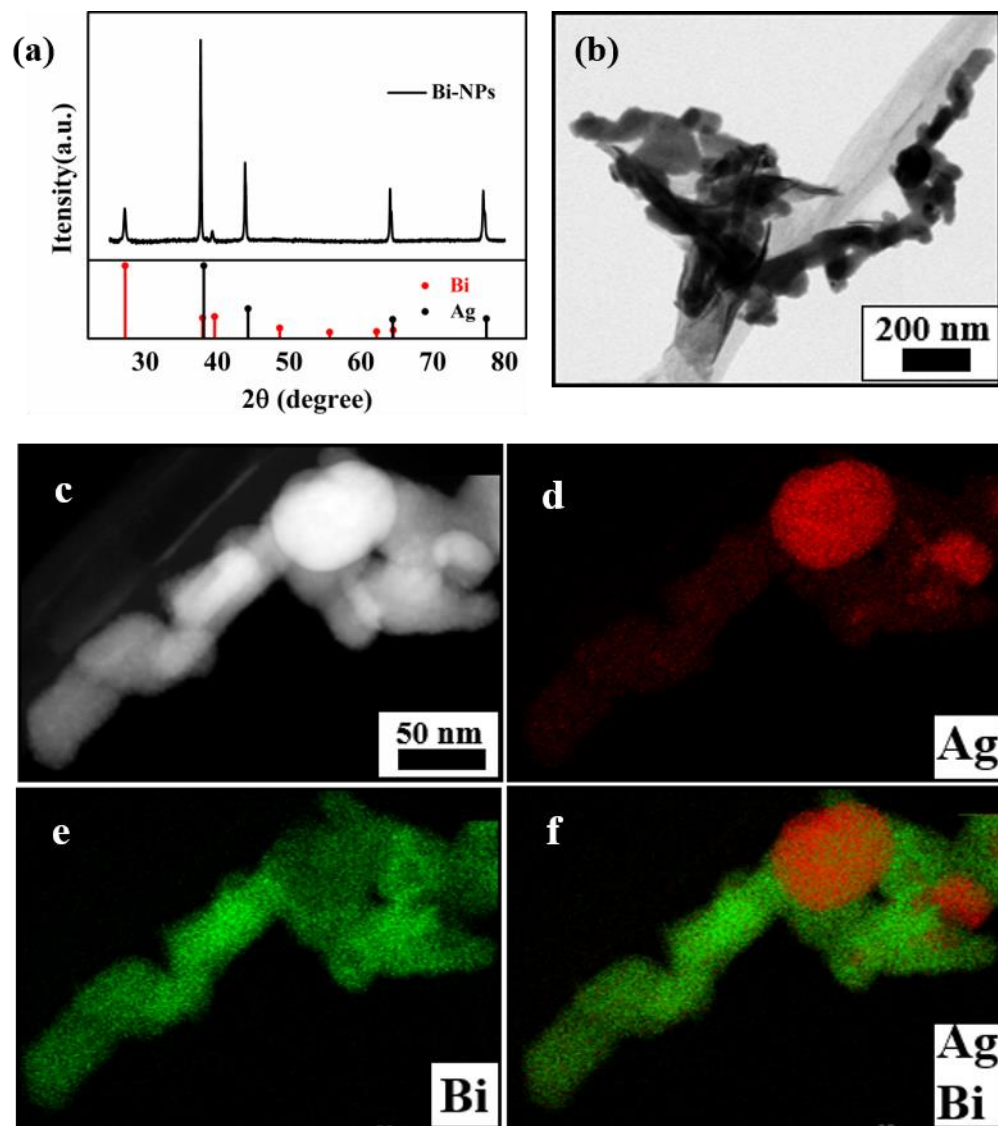

**Figure S4.** (a) XRD pattern, (b) TEM image, (c) STEM image and (d-f) element mapping images of the Bi-NPs with tens of nm.

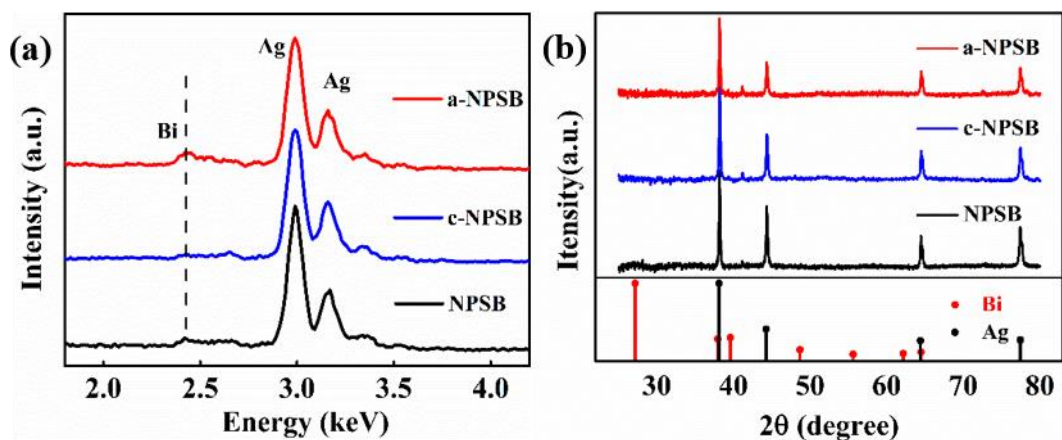

**Figure S5.** (a) The EDS and (b) XRD patterns of the NPSB, the c-NPSB and the c-NPSB. Bi signal is weak, and Ag signals from different samples show the nearly identical profile. XRD patterns of nanoporous Ag and the a-NPSB show one isolate Ag phase, implying that Bi elements are diluted into Ag lattice. The diffraction peak at 43° is the low level of residual  $\text{Ag}_2\text{Al}$  that cannot be dissolved by chemical dealloying.

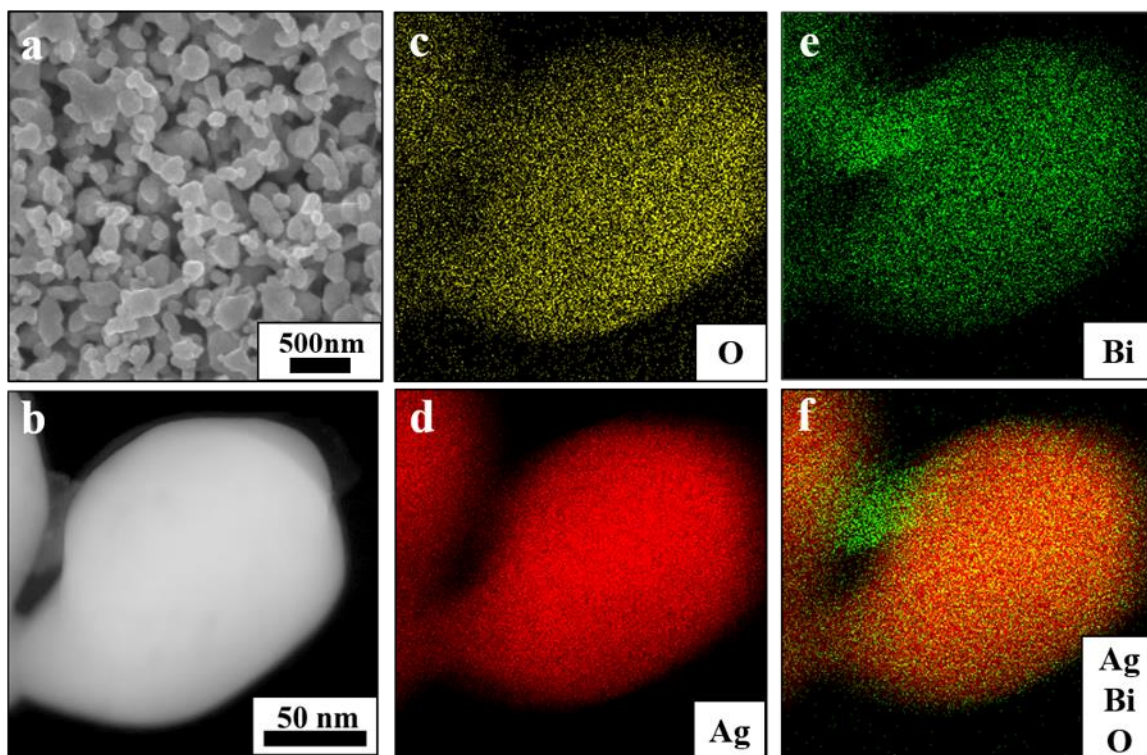

**Figure S6.** The morphology and element distribution of the ligaments in the c-NPSB. (a-b) SEM and STEM images of the c-NPSB exhibit the similar morphology with the a-NPSB. But no amorphous shell on the c-NPSB is observed on the surface of most ligaments. (c-f) Element mapping of Ag, Bi, O verifies that most of amorphous  $\text{Bi}_2\text{O}_3$  shells are dissolved when the a-NPSB is subjected to multiple CV stripping. Thus, some Bi elements are detected from the electrolytes after CV stripping by means of the ICP-OES.



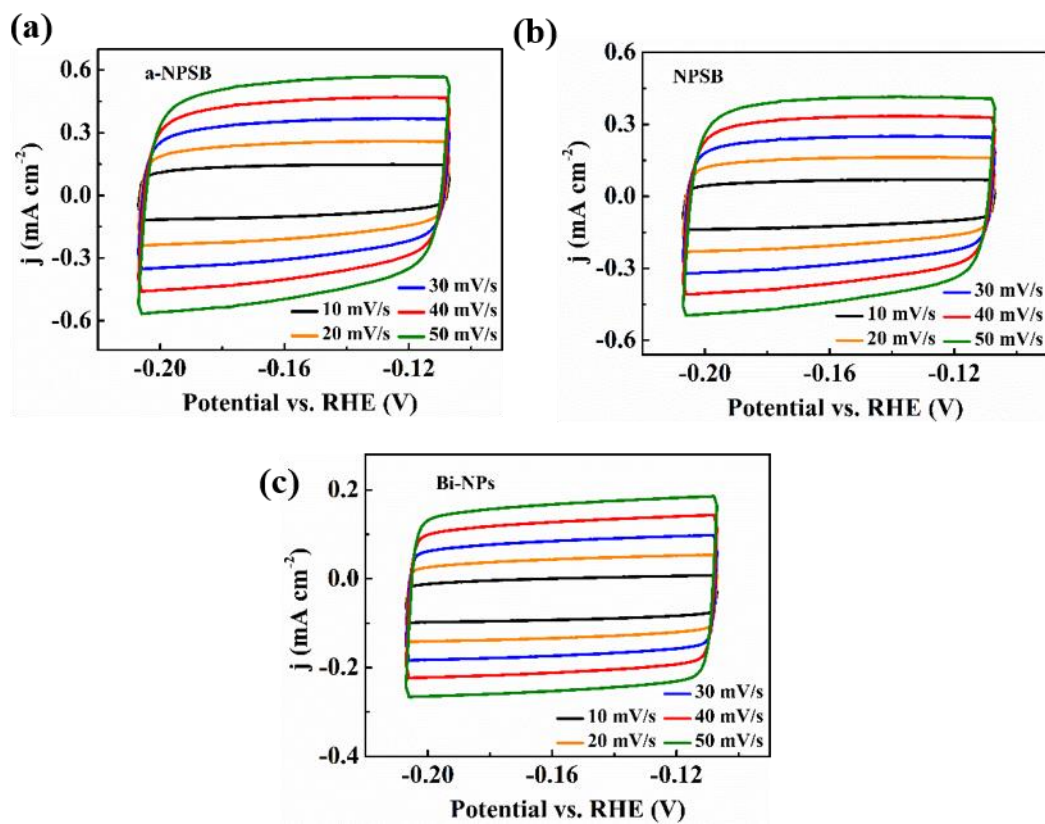

**Figure S7.** Cyclic voltammograms of (a) a-NPSB, (b) NPSB and (c) Bi-NPs with different scan rates.



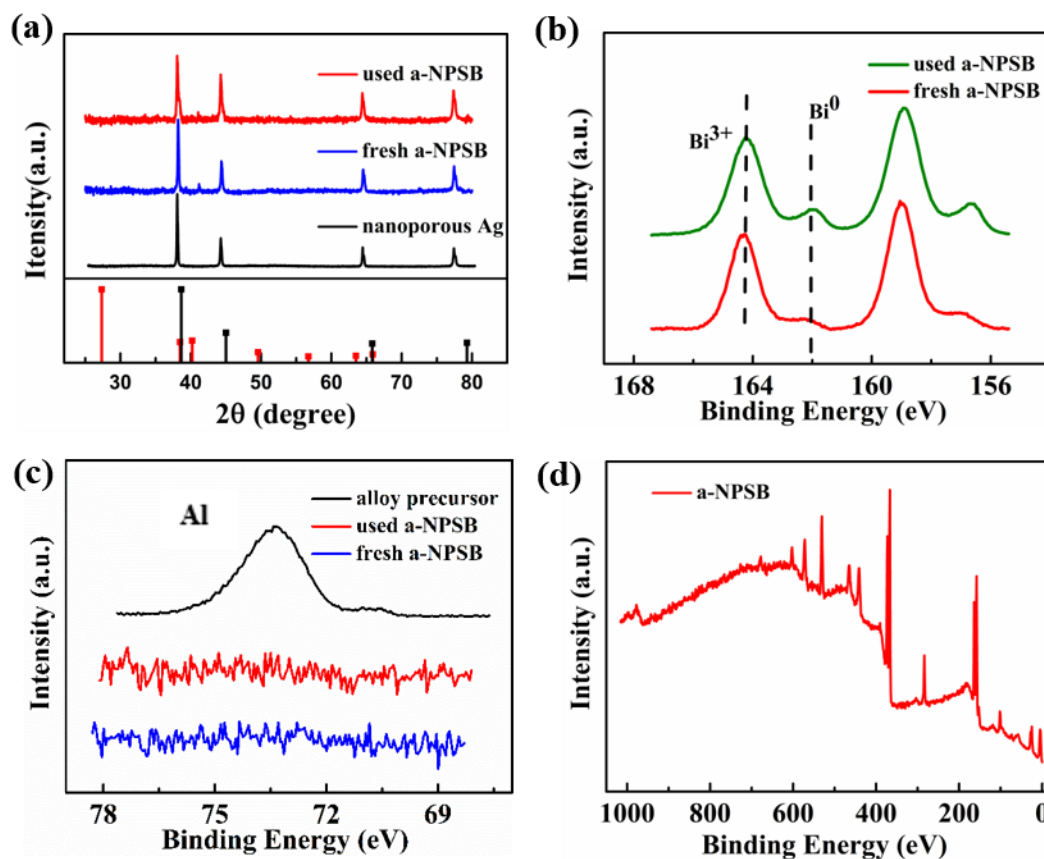

**Figure S8.** (a) XRD patterns of the used a-NPSB, fresh a-NPSB and nanoporous Ag. XPS patterns of (b) Bi and (c) Al elements on fresh a-NPSB and the a-NPSB after 18 hours electrochemical catalytic reaction. The Al signal is absent in the high resolution XPS, implying that the residual  $\text{Ag}_2\text{Al}$  locates at the inner skeletons rather than ligament surface. (d) XPS surveyed spectrum of the a-NPSB.

**Table S1** The ICP-OES analysis shows the Bi concentration in the NPSB, and the real concentration of NPSB detected by ICP-OES approaches to the expected concentration. The content of Bi in NPSB calculated based on the real concentration is 2.18%. The real concentration of Bi element in electrolyte is close to the expected concentration, demonstrating the dissolution of the amorphous Bi<sub>2</sub>O<sub>3</sub> shell.

| Electrode or electrolyte | Expected concentration (ppm) | Real concentration (ppm) |
|--------------------------|------------------------------|--------------------------|
| NPSB                     | 7.663                        | 6.9035                   |
| Electrolyte              | 0.0223                       | 0.0294                   |

**Table S2** CO<sub>2</sub>ER catalytic properties of various Bi derived catalysts.

| <b>Electrocatalyst</b>                                        | <b>Electrolyte</b>                                    | <b>Potential</b>    | <b>Current density</b>   | <b>FE</b> | <b>Stability test</b> | <b>Reference</b> |
|---------------------------------------------------------------|-------------------------------------------------------|---------------------|--------------------------|-----------|-----------------------|------------------|
| <b>Nanoporous Ag@Bi<sub>2</sub>O<sub>3</sub></b>              | 0.1 M KHCO <sub>3</sub>                               | -1.15 V vs. RHE     | 21.2 mA cm <sup>-2</sup> | 88.4%     | 18 h                  | This work        |
| <b>Bi<sub>2</sub>O<sub>3</sub>NSs@MCCM</b>                    | 0.1 M KHCO <sub>3</sub>                               | -1.356 V vs. RHE    | 17.7 mA cm <sup>-2</sup> | ~90%      | 12 h                  | 1                |
| <b>3D fractal structures of Bi<sub>2</sub>O<sub>3</sub></b>   | 0.1 M KHCO <sub>3</sub>                               | -1.2 V vs. RHE      | 24 mA cm <sup>-2</sup>   | 87%       | 6 h                   | 2                |
| <b>Nanotube-derived Bi</b>                                    | 0.5 M KHCO <sub>3</sub>                               | -0.82 V vs. RHE     | 36 mA cm <sup>-2</sup>   | ~98%      | 48 h                  | 3                |
| <b>Bi<sub>2</sub>O<sub>3</sub> with enhanced Bi-O</b>         | 0.5 M KHCO <sub>3</sub>                               | -0.9 V vs. RHE      | ~8 mA cm <sup>-2</sup>   | 91%       | 24 h                  | 4                |
| <b>Bi nanoparticles/Bi<sub>2</sub>O<sub>3</sub> nanosheet</b> | 0.5 M NaHCO <sub>3</sub>                              | -0.86 V vs. RHE     | 10 mA cm <sup>-2</sup>   | >90%      | 24 h                  | 5                |
| <b>BiO<sub>x</sub>/C</b>                                      | 0.5 M NaHCO <sub>3</sub> and 0.5 M NaClO <sub>4</sub> | -1.75 V vs. Ag/AgCl | 16.1 mA cm <sup>-2</sup> | 93.4%     | 3 h                   | 6                |
| <b>Bi nanosheet</b>                                           | 0.5 M NaHCO <sub>3</sub>                              | -1.5 V vs. SCE      | 14 mA cm <sup>-2</sup>   | ~95%      | 10 h                  | 7                |
| <b>Defect-rich Bi</b>                                         | 0.5 M NaHCO <sub>3</sub>                              | -0.75 V vs. RHE     | 5.0 mA cm <sup>-2</sup>  | 84%       | 24 h                  | 8                |

- (1) Liu, S.; Lu, X.; Xiao, J.; Wang, X.; Lou, X. Bi<sub>2</sub>O<sub>3</sub> Nanosheets Grown on Multi-Channel Carbon Matrix to Catalyze Efficient CO<sub>2</sub> Electroreduction to HCOOH. *Angew. Chem. Int. Ed.* **2019**, *58*, 13828-13833.
- (2) Tran-Phu, T.; Daiyan, R.; Fusco, Z.; Ma, Z.; Amal, R.; Tricoli, A. Nanostructured  $\beta$ -Bi<sub>2</sub>O<sub>3</sub> Fractals on Carbon Fibers for Highly Selective CO<sub>2</sub> Electroreduction to Formate. *Adv. Funct. Mater.* **2019**, *30*, 1906478.
- (3) Gong, Q.; Ding, P.; Xu, M.; Zhu, X.; Wang, M.; Deng, J.; Ma, Q.; Han, N.; Zhu, Y.; Lu, J.; Feng, Z.; Li, Y.; Zhou, W.; Li, Y. Structural Defects on Converted Bismuth Oxide Nanotubes Enable Highly Active Electrocatalysis of Carbon Dioxide Reduction. *Nat. Commun.* **2019**, *10*, 2807.
- (4) Deng, P.; Wang, H.; Qi, R.; Zhu, J.; Chen, S.; Yang, F.; Zhou, L.; Qi, K.; Liu, H.; Xia, B. Bismuth Oxides with Enhanced Bismuth-Oxygen Structure for Efficient Electrochemical Reduction of Carbon Dioxide to Formate. *ACS Catal.* **2020**, *10*, 743–750.
- (5) Li, L.; Ma, D.; Qi, F.; Chen, W.; Huang, S. Bi Nanoparticles/Bi<sub>2</sub>O<sub>3</sub> Nanosheets with Abundant Grain Boundaries for Efficient Electrocatalytic CO<sub>2</sub> Reduction. *Electrochimica Acta* **2019**, *298*, 580-586.
- (6) Lee, C. W.; Hong, J. S.; Yang, K. D.; Jin, K.; Lee, J. H.; Ahn, H.-Y.; Seo, H.; Sung, N.-E.; Nam, K. T. Selective Electrochemical Production of Formate from Carbon Dioxide with Bismuth-Based Catalysts in an Aqueous Electrolyte. *ACS Catal.* **2018**, *8*, 931–937.
- (7) Han, N.; Wang, Y.; Yang, H.; Deng, J.; Wu, J.; Li, Y.; Li, Y. Ultrathin Bismuth Nanosheets from in Situ Topotactic Transformation for Selective Electrocatalytic CO<sub>2</sub> Reduction to Formate. *Nat. Commun.* **2018**, *9*, 1320.
- (8) Zhang, Y.; Li, F.; Zhang, X.; Williams, T.; Easton, C. D.; Bond, A. M.; Zhang, J. Electrochemical Reduction of CO<sub>2</sub> on Defect-rich Bi Derived from Bi<sub>2</sub>S<sub>3</sub> with Enhanced Formate Selectivity. *J. Mater. Chem. A* **2018**, *6*, 4714-4720.
